# Supplementary material for: CasCollect: targeted assembly of CRISPR-associated operons from high-throughput sequencing data
Source: PubMed Central journal article supplement (PMC7671303; doi:10.1093/nargab/lqaa063), 2020-09-03
Supplement: lqaa063_supplemental_file.pdf [file lqaa063_supplemental_file.pdf]

## SUPPLEMENTARY TABLE AND FIGURES LEGENDS

Supplementary Figure S1. Comparative analysis of the CasCollect, complete assembly, and PRICE pipelines for isolate genomic datasets. (A) Schematic of the four steps for the CasCollect and complete assembly pipelines: files (blue) for trimming and stripping qualities; seed (orange) for the seed generation, expansion, and reassigning qualities; assembly (grey) for contig building; and annotate (yellow) for detecting CRISPR arrays and *cas* genes GFF3 output file. (B) Timings for each pipeline for each isolate genome and steps. (C) Percentage breakdown for time required for each step. (D) Number of contigs generated by each pipeline with (E) the length distribution for CasCollect, complete assembly, and PRICE. Colors for each step in (A) are used for the charts in (B) and (C).

Supplementary Figure S2. Comparative analysis of the CasCollect and PRICE pipelines for metagenomic datasets. (A) Timings for each pipeline for each isolate genome and steps. (B) Percentage breakdown for time required for each step. The timings for PRICE were stopped after 200 cycles that corresponded to a 3-5 fold time increase compared to CasCollect. The timing for PRICE was insufficient to assemble the majority of *cas* operons.

Supplementary Figure S3. Comparative analysis of the CasCollect and complete assembly pipelines for simulated metagenomic data. (A) Schematic of the four steps for the CasCollect and complete assembly pipelines: Files (blue) for trimming, Seed (orange) for the seed generation by protein mode, Assembly (grey) for contig building, and Annotate (yellow) for the general feature format file of CRISPR/Cas genes. (B) Timings for each pipeline with each step in the pipelines. (C) Percentage breakdown for time required for each step. (D) Number of contig generated by each pipeline with the length distribution for CasCollect (E) and complete assembly (F) characterized. Colors for each step in (A) used for the charts in (B) and (C).

Supplementary Figure S4. Discrepancy in spacer number within CRISPR arrays. (A) Schematic of the CRISPR array from AR110 (SRR3112345) with CasCollect targeted and complete assembly. (B) The sequence of each direct repeat (uppercase) and spacer (lowercase). (C) Read coverage from mapping the raw sequencing reads onto the CRISPR arrays from targeted and complete assembly. Coverage across the targeted assembled was consistent, while the 180 bp region comprising three duplicates of the direct repeat and spacer in the complete assembly had low coverage.

Supplementary Table S1. List of species with CRISPR repeats available for the DNA mode of CasCollect.

Supplementary Table S2. Identification of *Pseudomonas aeruginosa* CRISPR arrays lacking *cas* operons with CasCollect.

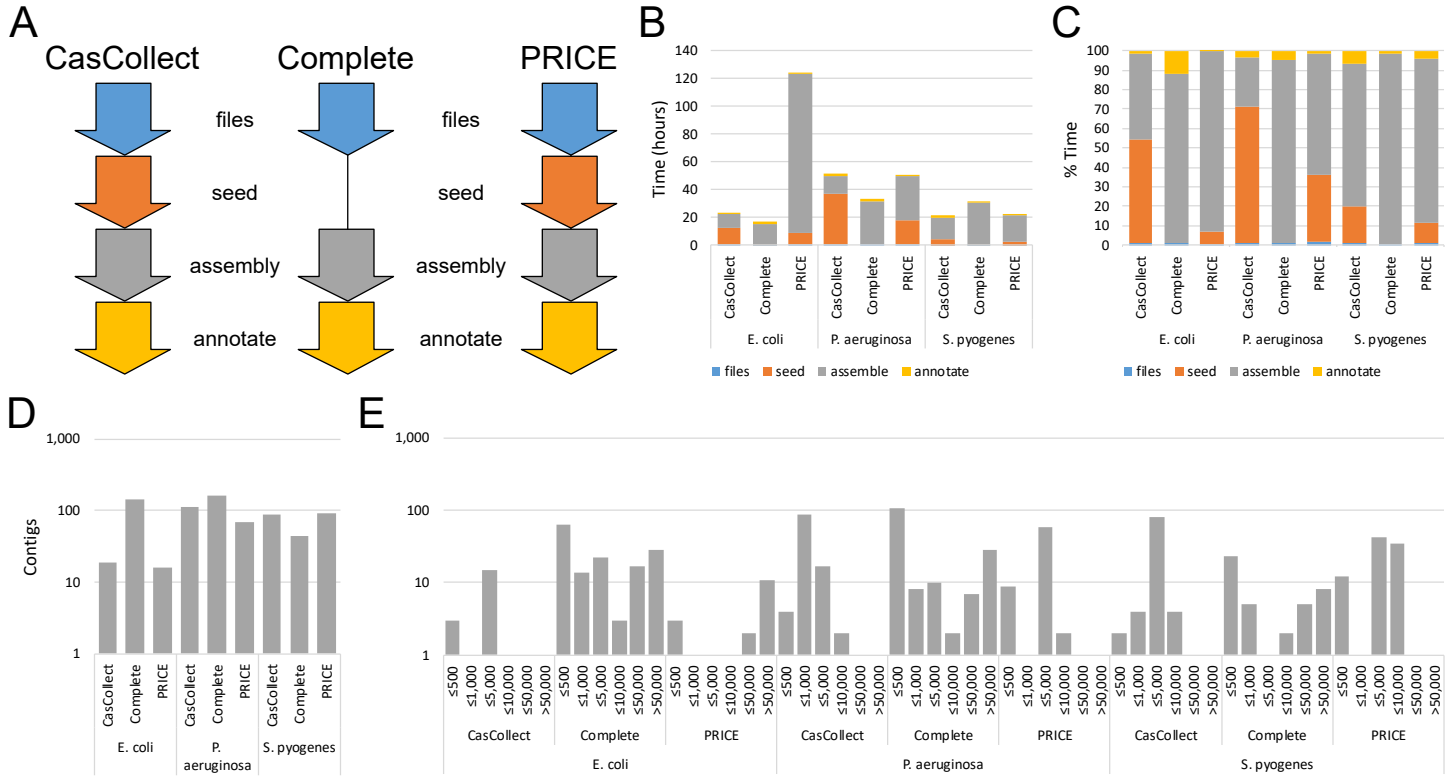

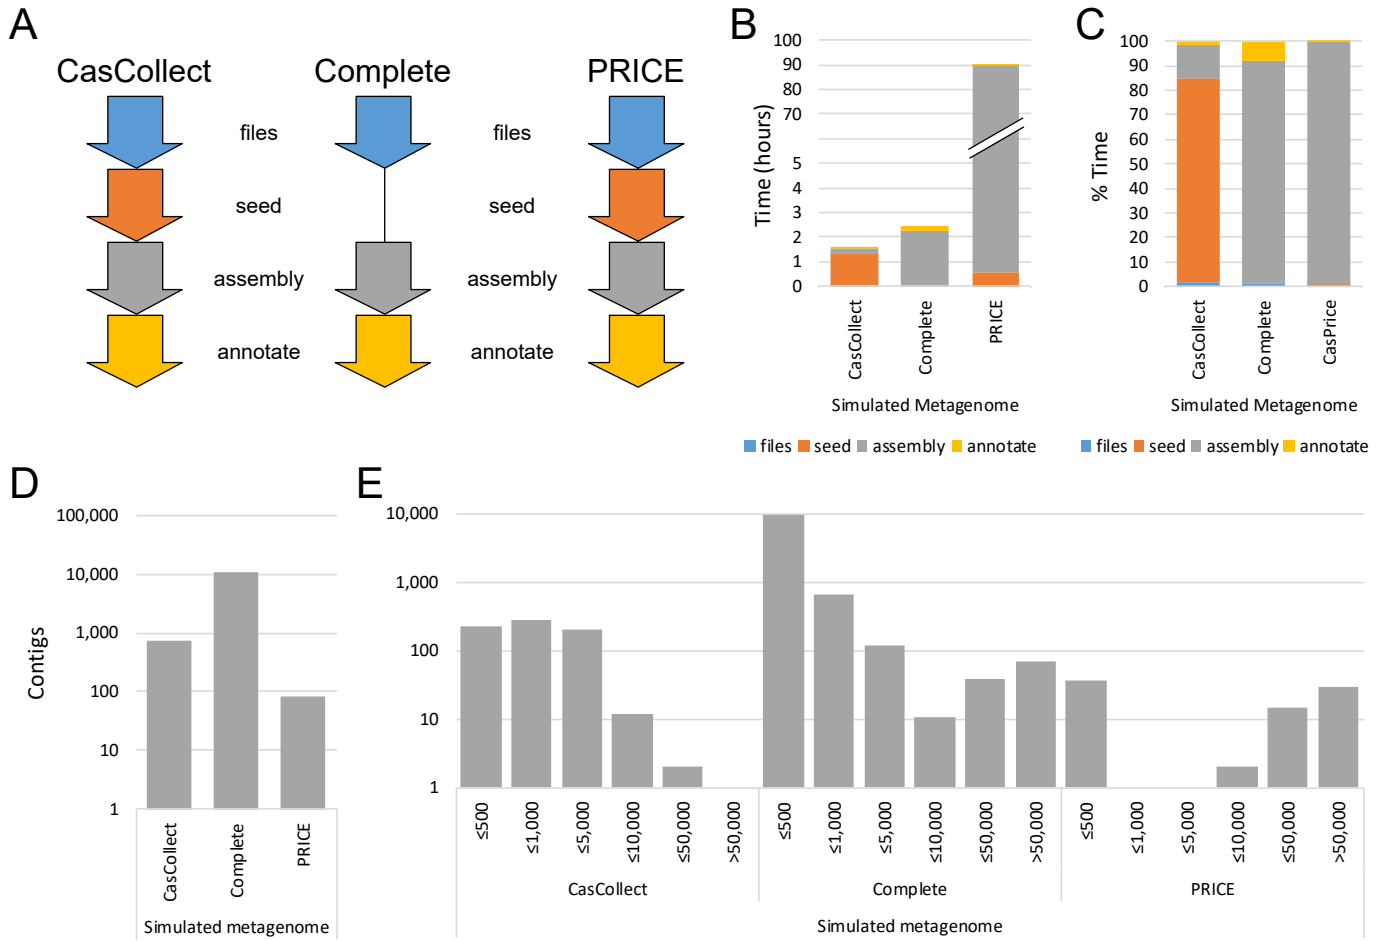

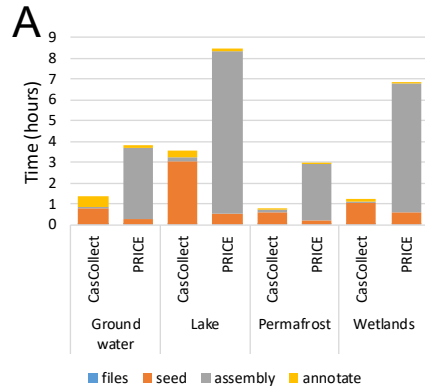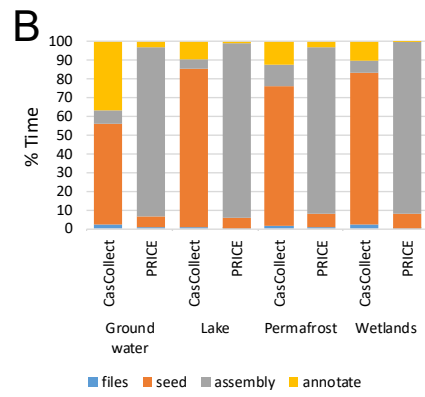

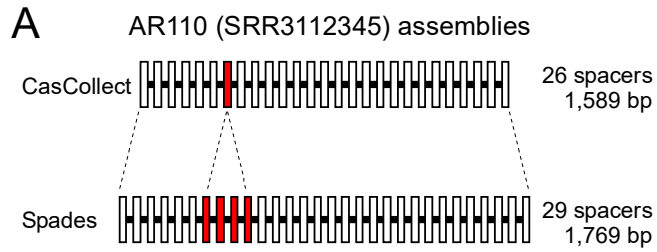

**B**

1 28 60

```

GTTCACTGCCGTGTAGGCAGCTAAGAAA tggctgatcaggctccagaa cggatcgtagac
GTTCACTGCCGTGTAGGCAGCTAAGAAA ttgatatgccggtagaacgtcggcgagacat
GTTCACTGCCGTGTAGGCAGCTAAGAAA tcgaacgctgctgagcgcgaacgcatagatg
GTTCACTGCCGTGTAGGCAGCTAAGAAA agaccgagggcgtcgaaaactcgatgatc
GTTCACTGCCGTGTAGGCAGCTAAGAAA ttcgacggccacgctcagcccggcccaggcc
GTTCACTGCCGTGTAGGCAGCTAAGAAA ttattgaaatccatcagcggctcgcactgtctc
GTTCACTGCCGTGTAGGCAGCTAAGAAA tgatcaccacaagcgtgcgta tcgcccattcc
GTTCACTGCCGTGTAGGCAGCTAAGAAA tgatcaccacaagcgtgcgta tcgcccattcc
GTTCACTGCCGTGTAGGCAGCTAAGAAA tgatcaccacaagcgtgcgta tcgcccattcc
GTTCACTGCCGTGTAGGCAGCTAAGAAA tgatcaccacaagcgtgcgta tcgcccattcc
GTTCACTGCCGTGTAGGCAGCTAAGAAA tgggtgtccaacatcgacgggtcgaactgtctc
GTTCACTGCCGTGTAGGCAGCTAAGAAA tggctgata tggccgga tcatagcgcgacctac
GTTCACTGCCGTGTAGGCAGCTAAGAAA ttoggtacttctgaaccatacgtcgcgcgata
GTTCACTGCCGTGTAGGCAGCTAAGAAA agtcatcgatgaaacgacgagccggtcagtgcc
GTTCACTGCCGTGTAGGCAGCTAAGAAA agaagctggagcagcggctggcggcaattcgt
GTTCACTGCCGTGTAGGCAGCTAAGAAA ccggacgttcacgctggtggtgagacca tccg
GTTCACTGCCGTGTAGGCAGCTAAGAAA tggctgtcgtcgtcgtcgtcgtcgtcgtcgtat
GTTCACTGCCGTGTAGGCAGCTAAGAAA aggtggtccagagcgggtcgaacggcacggtc
GTTCACTGCCGTGTAGGCAGCTAAGAAA gaaccgcccgttcatctgtgaaaggccatcgtc
GTTCACTGCCGTGTAGGCAGCTAAGAAA acatcagcgcgcggtagccgatgocgatatac
GTTCACTGCCGTGTAGGCAGCTAAGAAA acca tcccggccacgggttgcggacacctg
GTTCACTGTCGTGTAGGCAGCTAAGAAA gtccatccgggtagg tcaactcaccgtcgtat
GTTCACTGCCGTGTAGGCAGCTAAGAAA tggagagtgaaccgctcaagaccgagcccgag
GTTCACTGCCGTGTAGGCAGCTAAGAAA tga tgcgggaca tgggacgtttcgcgggaacc
GTTCACTGCCGTGTAGGCAGCTAAGAAA ccggacgcccetaatc tggagggc tccctggca
GTTCACTGCCGTGTAGGCAGCTAAGAAA ttccccgcggagcatagcagggatattctgt
GTTCACTGCCGTGTAGGCAGCTAAGAAA tacaagcagatcggcagctgagcggcaaggga
GTTCACTGCCGTGTAGGCAGCTAAGAAA tcgtactggtcagat tccgattcggaaagcc
GTTCACTGCCGTGTAGGCAGCTAAGAAA ttogacgcgcgtagggttgcgcgcatcgcctc
GTTCACTGCCGTGTAGGCAGCTAAGAAA

```

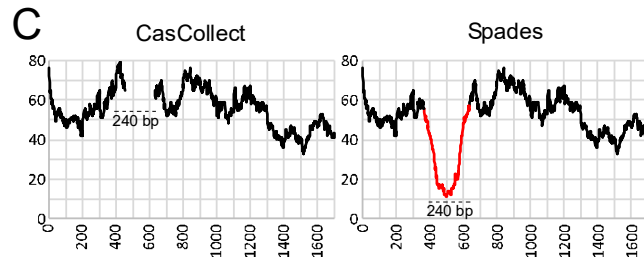

| CRISPR array repeats                                                      |                                                                              |
|---------------------------------------------------------------------------|------------------------------------------------------------------------------|
| <i>Aeropyrum camini</i>                                                   | <i>Microclunatus phosphovorus</i> NM-1                                       |
| <i>Alicyclobacillus acidocaldarius</i> subsp <i>acidocaldarius</i> Tc-4-1 | <i>Mycobacterium canettii</i> CIPT 140010059                                 |
| <i>Azotobacter vinelandii</i> CA                                          | <i>Mycobacterium tuberculosis</i> RGTB327                                    |
| <i>Bdellovibrio exovorus</i> JSS                                          | <i>Mycoplasma gallisepticum</i> S6                                           |
| <i>Bibersteinia trehalosi</i> USDA-ARS-USMARC-192                         | <i>Myxococcus stipitatus</i> DSM 14675                                       |
| <i>Bifidobacterium longum</i> subsp <i>longum</i> KACC 91563              | <i>Neisseria meningitidis</i> Z2491                                          |
| <i>Brachyspira hyodysenteriae</i> WA1                                     | <i>Nocardia cyriacigeorgica</i> GUH-2                                        |
| <i>Burkholderia</i> sp Y123                                               | <i>Nocardiopsis alba</i> ATCC BAA-2165                                       |
| <i>Calothrix</i> sp PCC 6303                                              | <i>Nostoc</i> sp PCC 7120                                                    |
| <i>Campylobacter</i> sp 03-427                                            | <i>Pasteurella multocida</i> 36950                                           |
| <i>Candidatus Arthromitus</i> sp SFB-mouse-Japan                          | <i>Pectobacterium carotovorum</i> subsp <i>carotovorum</i> PCC21             |
| <i>Chamaesiphon minutus</i> PCC 6605                                      | <i>Persephonella marina</i> EX-H1                                            |
| <i>Clostridium</i> sp SY8519                                              | <i>Phycisphaera mikurensis</i> NBRC 102666                                   |
| <i>Corynebacterium terpenotabidum</i> Y-11                                | <i>Pleurocapsa</i> sp PCC 7327                                               |
| <i>Crinalium epipsammum</i> PCC 9333                                      | <i>Porphyromonas gingivalis</i> TDC60                                        |
| <i>Cronobacter sakazakii</i> ES15                                         | <i>Propionibacterium acidipropionici</i> ATCC 4875                           |
| <i>Cycloclasticus zancles</i> 7-ME                                        | <i>Providencia stuartii</i> MRSN 2154                                        |
| <i>Dehalococcoides mccartyi</i> DCMB5                                     | <i>Pseudomonas aeruginosa</i> DK2                                            |
| <i>Desulfocapsa sulfexigens</i> DSM 10523                                 | <i>Pyrobaculum</i> sp 1860                                                   |
| <i>Desulfovibrio hydrothermalis</i> AM13                                  | <i>Pyrococcus</i> sp ST04                                                    |
| <i>Enterococcus faecalis</i> D32                                          | <i>Ralstonia solanacearum</i> Po82                                           |
| <i>Escherichia coli</i> str K-12 substr MDS42 DNA                         | <i>Rhodospirillum photometricum</i> DSM 122                                  |
| <i>Feridicoccus fontis</i> Kam940                                         | <i>Rhodospirillum rubrum</i> F11                                             |
| <i>Flavobacterium branchiophilum</i>                                      | <i>Riemerella anatipestifer</i> RA-CH-1                                      |
| <i>Frankia</i> sp Ccl3                                                    | <i>Saccharothrix espanaensis</i> DSM 44229                                   |
| <i>Gallibacterium anatis</i> UMN179                                       | <i>Salinispora arenicola</i> CNS-205                                         |
| <i>Geitlerinema</i> sp PCC 7407                                           | <i>Salmonella enterica</i> subsp <i>enterica</i> serovar Typhimurium str 798 |
| <i>Geobacillus thermoleovorans</i> CCB US3 UF5                            | <i>Sorangium cellulosum</i> So0157-2                                         |
| <i>Gloeobacter</i> sp JS                                                  | <i>Spiroplasma apis</i> B31                                                  |
| <i>Gloeocapsa</i> sp PCC 7428                                             | <i>Stanieria cyanosphaera</i> PCC 7437                                       |
| <i>Gordonia polyisoprenivorans</i> VH2                                    | <i>Staphylococcus aureus</i> 08BA02176                                       |
| <i>Granulibacter bethesdensis</i> CGDNIH1                                 | <i>Streptococcus equi</i> subsp <i>zooepidemicus</i> ATCC 35246              |
| <i>Halorhabdus tiamatea</i> SARL4B                                        | <i>Streptococcus lutetiensis</i> 033                                         |
| <i>Helicobacter cinaedi</i> PAGU611                                       | <i>Streptococcus macedonicus</i> ACA-DC 198                                  |
| <i>Hydrogenobaculum</i> sp 3684                                           | <i>Streptococcus salivarius</i> CCHSS3                                       |
| <i>Hyphomicrobium nitratorans</i> NL23                                    | <i>Streptococcus suis</i> YB51                                               |
| <i>Kibdelosporangium phytohabitans</i> strain KLBMP1111                   | <i>Streptococcus thermophilus</i> JIM 8232                                   |
| <i>Klebsiella oxytoca</i> KCTC 1686                                       | <i>Streptomyces hygrosopicus</i> subsp <i>jinggansensis</i> 5008             |
| <i>Lactobacillus brevis</i> KB290 DNA                                     | <i>Sulfobacillus acidophilus</i> TPY                                         |
| <i>Lactobacillus ruminis</i> ATCC 27782                                   | <i>Sulfolobus acidocaldarius</i> N8                                          |
| <i>Leptothrix cholodnii</i> SP-6                                          | <i>Synechococcus</i> sp PCC 7502                                             |
| <i>Leuconostoc gelidum</i> JB7                                            | <i>Synechocystis</i> sp PCC 6803                                             |
| <i>Listeria ivanovii</i> subsp <i>londoniensis</i> strain WSLC 30167      | <i>Taylorella asinigenitalis</i> MCE3                                        |
| <i>Listeria monocytogenes</i> M7                                          | <i>Tepidanaerobacter acetatoxydans</i> Re1                                   |
| <i>Mannheimia haemolytica</i> USDA-ARS-SAM-185                            | <i>Thermacetogenium phaeum</i> DSM 12270                                     |
| <i>Megasphaera elsdenii</i> DSM 20460                                     | <i>Thermoanaerobacterium saccharolyticum</i> JW-SL-YS485                     |
| <i>Melioribacter roseus</i> P3M                                           | <i>Thermococcus</i> sp 4557                                                  |
| <i>Melissococcus plutonius</i> DAT561                                     | <i>Thermogladus</i> sp 1633                                                  |
| <i>Metallosphaera cuprina</i> Ar-4                                        | <i>Thermotoga elfii</i> NBRC 107921                                          |
| <i>Methanocella</i> sp HZ254                                              | <i>Thermus</i> sp CCB US3 UF1                                                |
| <i>Methanoculleus bourgensis</i> MS2T                                     | <i>Thioalkalivibrio nitratireducens</i> DSM 14787                            |
| <i>Methanosaeta harundinacea</i> 6Ac                                      | <i>Tistrella mobilis</i> KA081020-06                                         |
| <i>Microcoleus</i> sp PCC 7113                                            |                                                                              |

| Strain | SRA        | Reads     | Type | CRISPR |         | Cas Genes |        |
|--------|------------|-----------|------|--------|---------|-----------|--------|
|        |            |           |      | Arrays | Spacers | #         | Operon |
| AR090  | SRR3112335 | 2,126,644 | n/a  | 0      | 0       | 0         | n/a    |
| AR092  | SRR3112336 | 1,225,103 | n/a  | 0      | 0       | 0         | n/a    |
| AR094  | SRR3112337 | 1,657,533 | n/a  | 0      | 0       | 0         | n/a    |
| AR100  | SRR3112340 | 2,087,105 | n/a  | 0      | 0       | 0         | n/a    |
| AR105  | SRR3112342 | 1,989,806 | n/a  | 0      | 0       | 0         | n/a    |
| AR231  | SRR4417542 | 478,617   | n/a  | 1      | 8       | 0         | n/a    |
| AR232  | SRR4417553 | 375,904   | n/a  | 0      | 0       | 0         | n/a    |
| AR233  | SRR4417558 | 615,859   | n/a  | 0      | 0       | 0         | n/a    |
| AR234  | SRR4417559 | 477,110   | n/a  | 0      | 0       | 0         | n/a    |
| AR236  | SRR4417561 | 488,238   | n/a  | 0      | 0       | 0         | n/a    |
| AR237  | SRR4417562 | 1,175,855 | n/a  | 0      | 0       | 0         | n/a    |
| AR239  | SRR4417532 | 1,008,367 | n/a  | 1      | 4       | 0         | n/a    |
| AR240  | SRR5122331 | 1,647,468 | n/a  | 0      | 0       | 0         | n/a    |
| AR244  | SRR4417533 | 856,508   | n/a  | 0      | 0       | 0         | n/a    |
| AR247  | SRR4417534 | 856,694   | n/a  | 0      | 0       | 0         | n/a    |
| AR251  | SRR4417535 | 882,484   | n/a  | 0      | 0       | 0         | n/a    |
| AR252  | SRR5122325 | 1,141,358 | n/a  | 0      | 0       | 0         | n/a    |
| AR253  | SRR4417536 | 884,811   | n/a  | 0      | 0       | 0         | n/a    |
| AR257  | SRR4417540 | 951,684   | n/a  | 0      | 0       | 0         | n/a    |
| AR258  | SRR4417541 | 975,106   | n/a  | 0      | 0       | 0         | n/a    |
| AR259  | SRR4417543 | 881,366   | n/a  | 0      | 0       | 0         | n/a    |
| AR260  | SRR4417544 | 953,363   | n/a  | 1      | 12      | 0         | n/a    |
| AR263  | SRR4417547 | 918,300   | n/a  | 0      | 0       | 0         | n/a    |
| AR264  | SRR4417548 | 877,917   | n/a  | 1      | 10      | 0         | n/a    |
| AR265  | SRR4417549 | 766,911   | n/a  | 1      | 13      | 0         | n/a    |
| AR266  | SRR4417550 | 857,564   | n/a  | 0      | 0       | 0         | n/a    |
| AR269  | SRR4417554 | 1,011,282 | n/a  | 0      | 0       | 0         | n/a    |
| AR270  | SRR4417555 | 1,012,411 | n/a  | 0      | 0       | 0         | n/a    |
| AR271  | SRR4417556 | 896,578   | n/a  | 0      | 0       | 0         | n/a    |
| AR272  | SRR4417557 | 777,887   | n/a  | 0      | 0       | 0         | n/a    |
| AR352  | SRR6985662 | 7,982,657 | n/a  | 1      | 14      | 0         | n/a    |
| AR353  | SRR6799371 | 3,957,778 | n/a  | 1      | 10      | 0         | n/a    |
| AR354  | SRR6799376 | 4,153,625 | n/a  | 0      | 0       | 0         | n/a    |
| AR357  | SRR6799382 | 4,035,637 | n/a  | 0      | 0       | 0         | n/a    |
| AR359  | SRR6799387 | 3,194,525 | n/a  | 0      | 0       | 0         | n/a    |
